# Supplementary material for: A novel organic–inorganic hybrid phase transition compound based on 4-ethylmorpholine with switchable dielectric and luminescent properties
Source: Royal Society of Chemistry journal article supplement (doi:10.1039/d1nj05074e), 2021-12-02
Supplement: d1nj05074e1.pdf [file d1nj05074e1.pdf]

## Supporting Information

# A novel organic-inorganic hybrid phase transition compound based on 4-Ethylmorpholine with switchable dielectric and luminescent properties

Jing-Yuan Liu, ‡ Si-Yu Ye, ‡ Min Wan, Yan-Ning Wang, Liang Tong and Li-Zhuang Chen\*<sup>a</sup>

<sup>a</sup> School of Environmental and Chemical Engineering, Jiangsu University of Science and Technology, Zhenjiang 212003, People's Republic of China.

### Experimental section

#### *Materials.*

4-Ethylmorpholine (Aladdin, 98%), Manganese Chloride Tetrahydrate (Aladdin, 99%), Cobalt (II) chloride (Aladdin, 99.9%), Cupric chloride dihydrate (Aladdin, 99.9%), hydrochloric acid and Deionized water were used as received.

#### *Synthesis.*

Compound 1 [4-Ethylmorpholine]<sub>2</sub>MnCl<sub>4</sub> was obtained by slowly evaporating corresponding aqueous solution (about 30 ml) containing 4-Ethylmorpholine (10 mol), manganese chloride tetrahydrate (10 mmol) and hydrochloric acid (about 3 ml) at room temperature for few days. The synthesis of 2 [4-Ethylmorpholine]<sub>2</sub>CoCl<sub>4</sub> and 3 [4-Ethylmorpholine]<sub>2</sub>CuCl<sub>4</sub> are similar to the one for [4-Ethylmorpholine]<sub>2</sub>MnCl<sub>4</sub>. They are obtained after slow evaporation of a stoichiometric mixture of 4-Ethylmorpholine, Cobalt (II) chloride and Cupric chloride dihydrate dilute hydrochloric acid and aqueous solution at room temperature.

#### *Methods.*

To record PXRD patterns, we used the Rigaku smartlab X-ray diffraction instrument in the 2 $\theta$  between 5° and 50° with a step size of 0.02°. Thermogravimetric analyses (TGA) were carried out on a NETZSCH TG209F3 system with a heating rate of 10 K min<sup>-1</sup> under a nitrogen atmosphere. Differential scanning calorimetry (DSC) measurements were carried out on a NETZSCH differential scanning calorimeter (polyma) under nitrogen atmosphere in aluminum crucibles with a heating or cooling rate of 15 K min<sup>-1</sup>. X-ray single crystal diffraction data of three compounds were performed using Mo-K $\alpha$  radiation ( $\lambda = 0.71073$ ) on a Bruker SMART APEX-II CCD diffractometer in the  $\omega$  scan mode. The structural data were collected at 293 K for three compounds. Data processing with empirical absorption correction was conducted by using the SADABS. Crystal structures were confirmed by direct methods and refined by full-matrix least-squares methods based on  $F^2$  through the SHELXTL and OLEX 2 software package. All non-hydrogen atoms were anisotropically refined via all reflections with  $I > 2\sigma(I)$ . In addition, the distances and angles between some atoms are calculated by DIAMOND.

CCDC 2112060 – 2112062 contain the supplementary crystallographic data for this paper. These data can be obtained free of charge from The Cambridge Crystallographic Data Center via [www.ccdc.cam.ac.uk/data.request/cif](http://www.ccdc.cam.ac.uk/data.request/cif)

**Table S1 Crystal parameters of compound**

| Moiety formula                                      | [C <sub>6</sub> H <sub>14</sub> NO] <sub>2</sub> MnCl <sub>4</sub> | [C <sub>6</sub> H <sub>14</sub> NO] <sub>2</sub> CoCl <sub>4</sub> | [C <sub>6</sub> H <sub>14</sub> NO] <sub>2</sub> CuCl <sub>4</sub> |
|-----------------------------------------------------|--------------------------------------------------------------------|--------------------------------------------------------------------|--------------------------------------------------------------------|
| Temperature                                         | 293 K                                                              | 293 K                                                              | 293 K                                                              |
| Weight                                              | 429.10                                                             | 433.09                                                             | 437.70                                                             |
| Crystal system                                      | <i>Triclinic</i>                                                   | <i>Triclinic</i>                                                   | <i>Monoclinic</i>                                                  |
| Space group                                         | <i>P</i> -1                                                        | <i>P</i> -1                                                        | <i>P</i> 2 <sub>1</sub> / <i>c</i>                                 |
| <i>a</i> /Å                                         | 8.2737(12)                                                         | 8.2361(4)                                                          | 17.5510(7)                                                         |
| <i>b</i> /Å                                         | 10.4938(15)                                                        | 10.4179(4)                                                         | 7.4842(3)                                                          |
| <i>c</i> /Å                                         | 12.0521(17)                                                        | 12.0049(5)                                                         | 16.2478(7)                                                         |
| <i>α</i> /deg                                       | 89.6020(10)                                                        | 89.486(3)                                                          | 90                                                                 |
| <i>β</i> /deg                                       | 79.5170(10)                                                        | 79.688(3)                                                          | 114.157(2)                                                         |
| <i>γ</i> /deg                                       | 84.3770(10)                                                        | 84.884(3)                                                          | 90                                                                 |
| Volume/Å <sup>3</sup>                               | 1023.9(3)                                                          | 1009.35(8)                                                         | 1947.33(14)                                                        |
| <i>Z</i>                                            | 2                                                                  | 2                                                                  | 4                                                                  |
| <i>R</i> <sub>1</sub> [ <i>I</i> > 2σ( <i>I</i> )]  | 0.0372                                                             | 0.0374                                                             | 0.0322                                                             |
| <i>wR</i> <sub>2</sub> [ <i>I</i> > 2σ( <i>I</i> )] | 0.0808                                                             | 0.1029                                                             | 0.0830                                                             |
| GOF                                                 | 1.010                                                              | 1.098                                                              | 1.051                                                              |

**Table S2. Hydrogen bonds under 293 K for compound 1**

| D—H...A                    | D—H     | H...A    | D...A    | <DHA    |
|----------------------------|---------|----------|----------|---------|
| N1—H1...Cl1                | 0.98(2) | 2.31(7)  | 3.216(2) | 154(12) |
| N2—H2...Cl4                | 0.98(2) | 2.32(7)  | 3.206(2) | 150(13) |
| C6—H6A...Cl2 <sup>i</sup>  | 0.97(3) | 2.70(8)  | 3.577(3) | 150(16) |
| C8—H8B...Cl3 <sup>ii</sup> | 0.97(3) | 2.82(8)  | 3.732(3) | 156(18) |
| C9—H9B...O2 <sup>iii</sup> | 0.97(4) | 2.44(19) | 3.364(4) | 159(2)  |

Symmetry codes: (i) 1-x, 1-y, 1-z; (ii) x, -1+y, z; (iii) x, 1+y, z.

**Table S3. Hydrogen bonds under 293 K for compound 2**

| D—H...A                   | D—H      | H...A      | D...A      | <DHA       |
|---------------------------|----------|------------|------------|------------|
| N1—H1...Cl1               | 0.910(2) | 2.3794(18) | 3.2237(18) | 154.4(2)   |
| N2—H2...Cl4               | 0.910(2) | 2.3810(18) | 3.2071(18) | 150.88(18) |
| C1—H1B...Cl2 <sup>i</sup> | 0.970(3) | 2.715(2)   | 3.599(2)   | 151.8(2)   |
| C7—H7A...O1 <sup>ii</sup> | 0.969(5) | 2.411(4)   | 3.329(4)   | 157.7(3)   |

Symmetry codes: (i) 1-x, 1-y, 1-z; (ii) x, -1+y, z.

**Table S4. Hydrogen bonds under 293 K for compound 3**

| D—H...A                  | D—H      | H...A   | D...A      | <DHA    |
|--------------------------|----------|---------|------------|---------|
| N1—H1...Cl2              | 0.98(15) | 2.30(6) | 3.2417(16) | 162(9)  |
| N2—H2...Cl1              | 0.98(14) | 2.59(7) | 3.2936(18) | 129(13) |
| N2—H2...Cl4              | 0.98(14) | 2.53(6) | 3.4005(19) | 148(13) |
| C1—H1B...O2 <sup>i</sup> | 0.97(14) | 2.60(2) | 3.402(3)   | 141(16) |

Symmetry codes: (i) 1-x, -y, 2-z.

**Table S5. Selected bond lengths [Å] and angles [°] for compound 1 at 293 K**

| (Length/Å)  |           |           |          |
|-------------|-----------|-----------|----------|
| Mn1—Cl1     | 2.3601(7) | N1—C2     | 1.493(3) |
| Mn1—Cl4     | 2.3624(8) | N2—C1     | 1.493(3) |
| Mn1—Cl2     | 2.3474(8) | N2—C12    | 1.494(3) |
| Mn1—Cl3     | 2.3334(8) | N2—C9     | 1.497(4) |
| O1—C10      | 1.418(3)  | C1—C10    | 1.495(4) |
| O1—C7       | 1.419(4)  | C4—C6     | 1.493(4) |
| O2—C3       | 1.414(3)  | C8—C3     | 1.495(4) |
| O2—C3       | 1.406(3)  | C12—C7    | 1.478(4) |
| N1—C4       | 1.490(3)  | C2—C11    | 1.490(5) |
| N1—C8       | 1.496(3)  | C9—C5     | 1.420(5) |
| (Angle/°)   |           |           |          |
| Cl1-Mn1-Cl4 | 108.04(3) | C1-N2-C9  | 113.4(2) |
| Cl2-Mn1-Cl1 | 106.40(3) | C12-N2-C9 | 110.1(2) |
| Cl2-Mn1-Cl4 | 108.97(3) | N2-C1-C10 | 110.5(2) |
| Cl3-Mn1-Cl1 | 117.44(3) | N1-C4-C6  | 110.2(2) |
| Cl3-Mn1-Cl4 | 107.32(3) | O2-C6-C4  | 111.7(2) |
| Cl3-Mn1-Cl2 | 108.45(3) | C3-C8-N1  | 110.1(2) |
| C10-O1-C7   | 109.1(2)  | O1-C10-C1 | 111.7(2) |
| C3-O2-C6    | 108.9(2)  | C7-C12-N2 | 111.2(2) |
| C4-N1-C8    | 109.8(2)  | O2-C3-C8  | 111.1(2) |
| C4-N1-C2    | 112.9(2)  | O1-C7-C12 | 111.0(2) |
| C2-N1-C8    | 111.6(2)  | C11-C2-N1 | 113.3(3) |
| C1-N2-C12   | 109.3(2)  | C5-C9-N2  | 114.5(3) |

**Table S6. Selected bond lengths [Å] and angles [°] for compound 2 at 293 K**

| (Length/Å) |           |        |          |
|------------|-----------|--------|----------|
| Co1—C11    | 2.2787(5) | N1—C9  | 1.497(3) |
| Co1—C14    | 2.2805(6) | N2—C6  | 1.500(2) |
| Co1—C12    | 2.2643(5) | N2—C12 | 1.500(3) |
| Co1—C13    | 2.2559(5) | N2—C7  | 1.500(3) |
| O1—C1      | 1.411(3)  | C1—C4  | 1.500(3) |
| O1—C3      | 1.410(3)  | C6—C10 | 1.501(3) |
| O2—C10     | 1.421(3)  | C8—C3  | 1.496(4) |
| O2—C2      | 1.426(3)  | C12—C2 | 1.475(4) |
| N1—C4      | 1.497(3)  | C7—C5  | 1.448(4) |
| N1—C8      | 1.506(3)  | C9—C11 | 1.491(5) |

| (Angle/°)   |            |           |            |
|-------------|------------|-----------|------------|
| C11-Co1-C14 | 107.69(2)  | C1-N2-C9  | 113.03(17) |
| C12-Co1-C11 | 106.99(2)  | C7-N2-C12 | 110.17(18) |
| C12-Co1-C14 | 109.44(2)  | O1-C1-C4  | 111.44(19) |
| C13-Co1-C11 | 116.07(2)  | N1-C4-C1  | 110.08(16) |
| C13-Co1-C14 | 107.72(2)  | N2-C6-C10 | 110.45(16) |
| C13-Co1-C12 | 108.81(2)  | C3-C8-N1  | 110.44(19) |
| C3-O1-C1    | 109.37(16) | O2-C10-C6 | 111.73(18) |
| C10-O2-C2   | 109.28(16) | C2-C12-N2 | 110.94(18) |
| C4-N1-C8    | 109.30(16) | O1-C3-C8  | 110.6(2)   |
| C9-N1-C4    | 112.8(2)   | C5-C7-N2  | 113.9(2)   |
| C9-N1-C8    | 112.0(2)   | O2-C2-C12 | 111.57(18) |
| C12-N2-C6   | 109.56(15) | C11-C9-N1 | 112.9(3)   |

**Table S7. Selected bond lengths [Å] and angles [°] for compound 3 at 293 K**

**(Length/Å)**

|         |           |        |          |
|---------|-----------|--------|----------|
| Cu1—C11 | 2.2482(5) | N1—C7  | 1.488(2) |
| Cu1—C14 | 2.2532(6) | N2—C8  | 1.490(3) |
| Cu1—C12 | 2.2505(6) | N2—C10 | 1.493(3) |
| Cu1—C13 | 2.2230(7) | N2—C5  | 1.506(3) |
| O1—C12  | 1.419(3)  | C1—C6  | 1.506(3) |
| O1—C3   | 1.416(3)  | C4—C9  | 1.494(3) |
| O2—C6   | 1.418(3)  | C8—C12 | 1.510(3) |
| O2—C2   | 1.410(3)  | C10—C3 | 1.488(4) |
| N1—C1   | 1.494(2)  | C7—C2  | 1.502(4) |
| N1—C4   | 1.499(3)  | C5—C11 | 1.471(4) |

**(Angle/°)**

|             |            |           |             |
|-------------|------------|-----------|-------------|
| C11-Cu1-C14 | 97.25(2)   | C8-N2-C5  | 114.25(18)  |
| C11-Cu1-C12 | 133.61(3)  | C10-N2-C5 | 111.17(18)  |
| C12-Cu1-C14 | 99.03(3)   | N1-C1-C6  | 110.07(17)  |
| C13-Cu1-C11 | 100.93(3)  | C9-C4-N1  | 112.83(18)  |
| C13-Cu1-C14 | 135.16(3)  | O2-C6-C1  | 111.6(2)    |
| C13-Cu1-C12 | 97.34(3)   | N2-C8-C12 | 110.47(17)  |
| C3-O1-C12   | 110.18(16) | C3-C10-N2 | 109.73(18)  |
| C2-O2-C6    | 110.18(16) | O1-C12-C8 | 111.88(19)  |
| C1-N1-C4    | 113.69(16) | O1-C3-C10 | 111.4(2)    |
| C7-N1-C1    | 108.91(16) | N1-C7-C2  | 109.51 (19) |
| C7-N1-C4    | 110.66(17) | O2-C2-C7  | 112.09(19)  |
| C8-N2-C10   | 108.71(17) | C11-C5-N2 | 112.5(2)    |

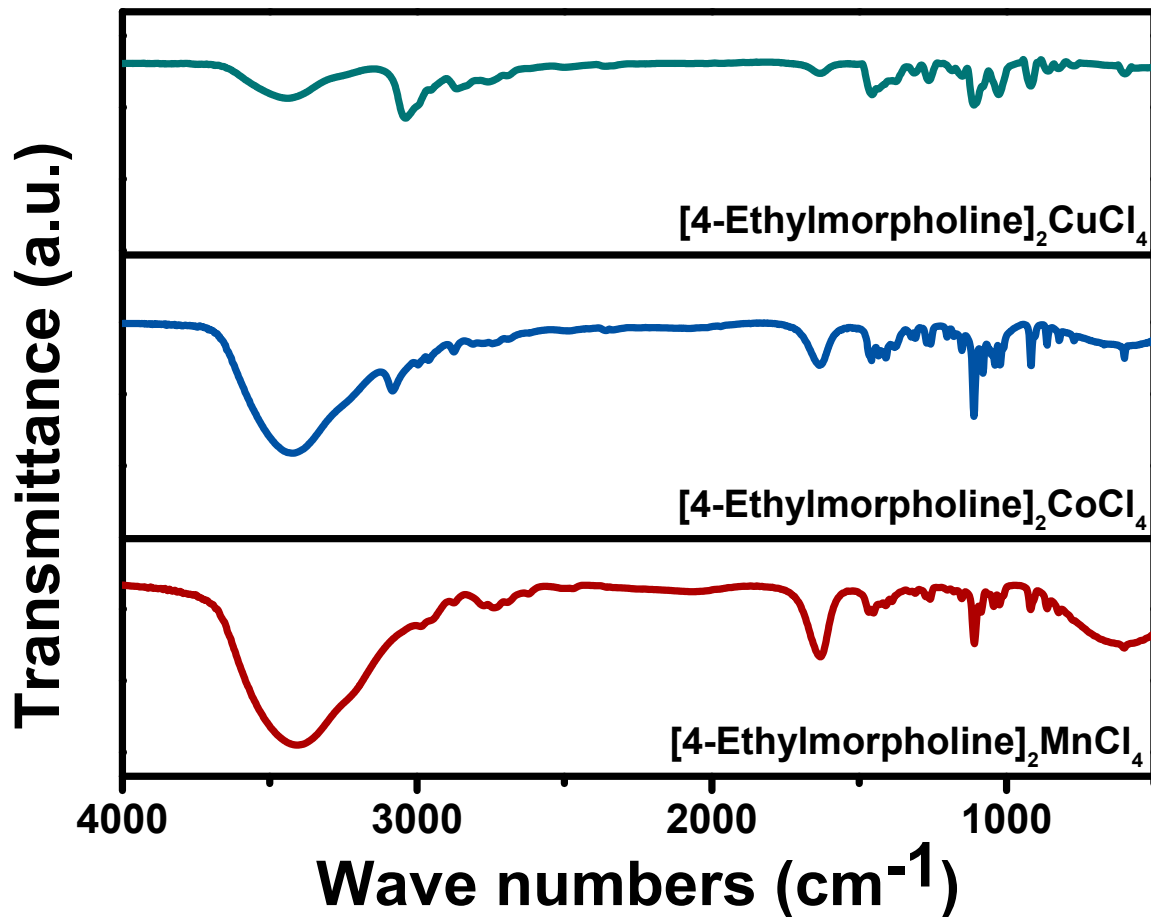

Figure S1. IR of the compound 1, compound 2 and compound 3.

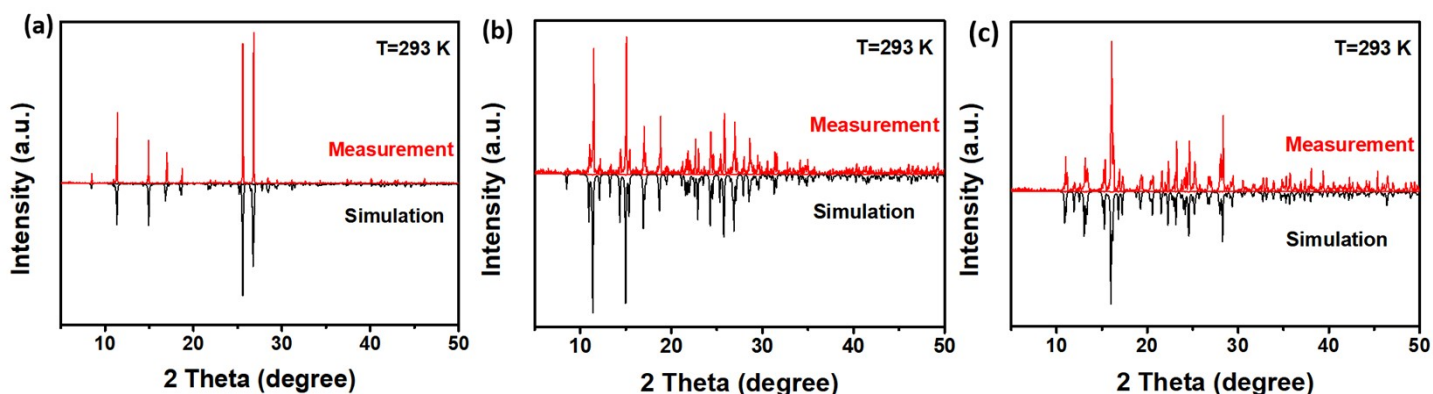

Figure S2. XRD measurement of compound 1 (a), compound 2 (b) and compound 3 (c).

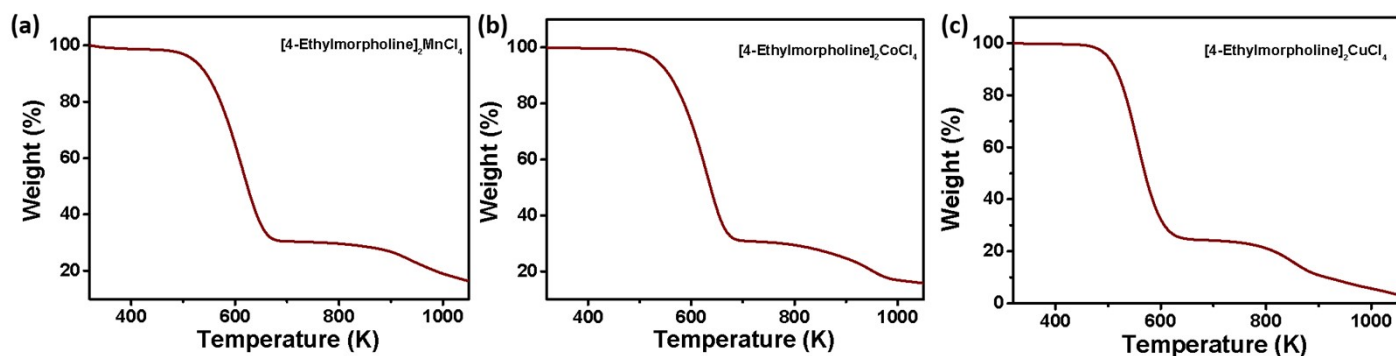

Figure S3. TGA of the compound 1 (a), compound 2 (b) and compound 3 (c).

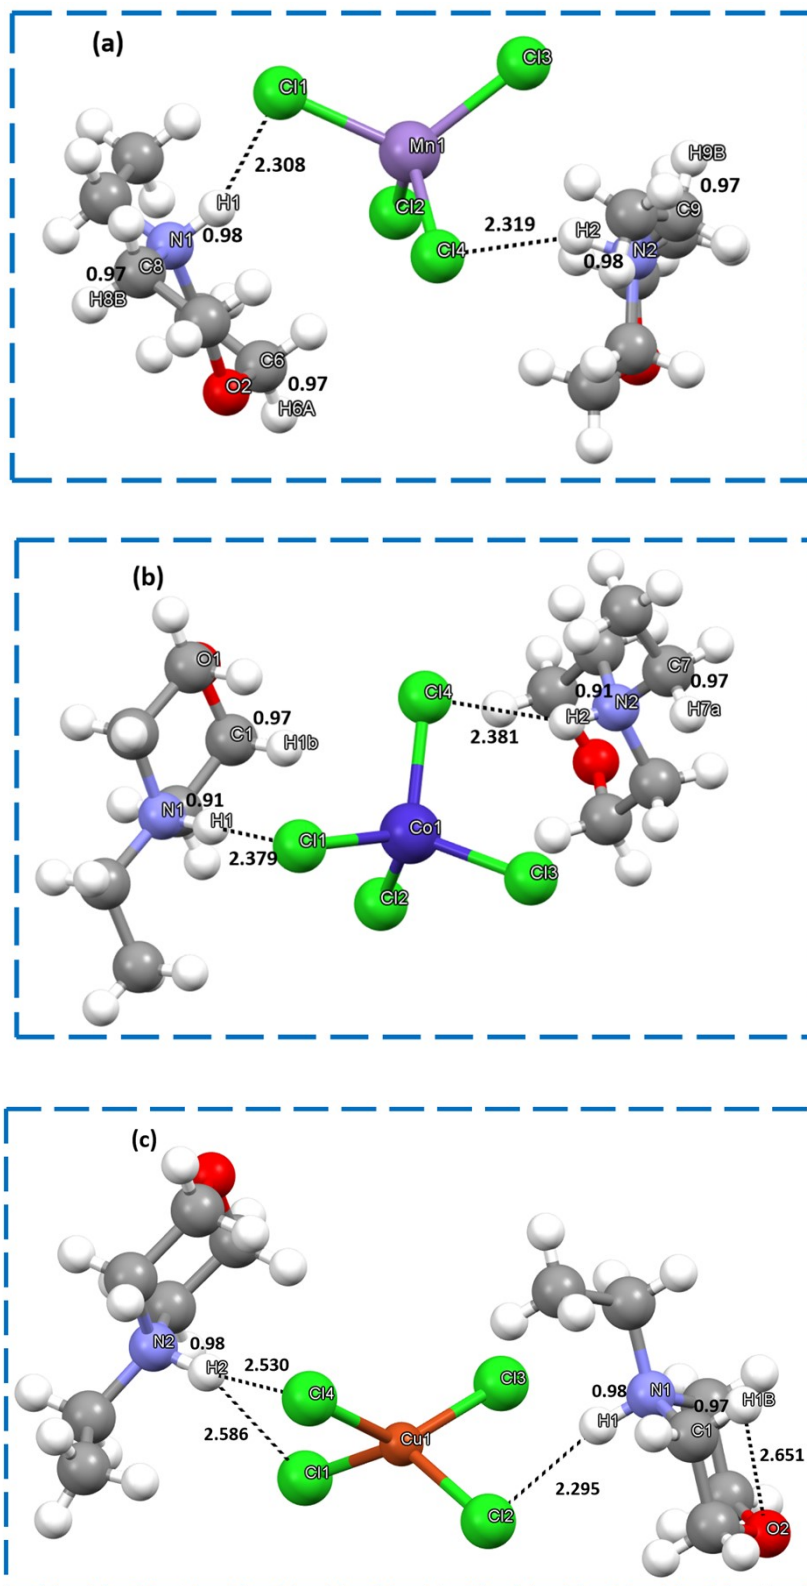

**Figure S4.** Compound structures of compound 1 (a), compound 2 (b) and compound 3 (c).

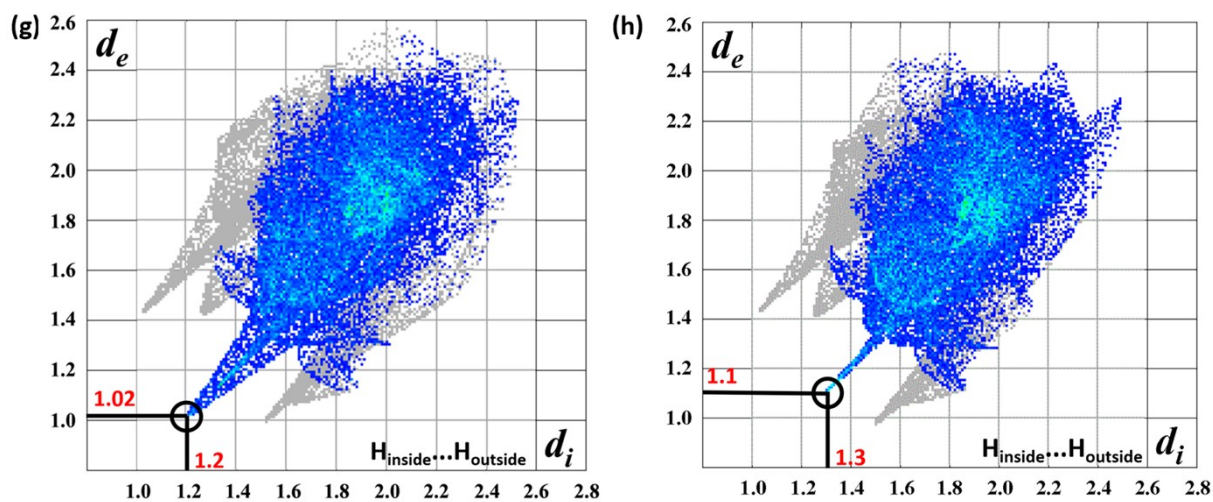

**Figure S5.** Two-dimensional fingerprint plots of compound 1 (g) and compound 2 (h).

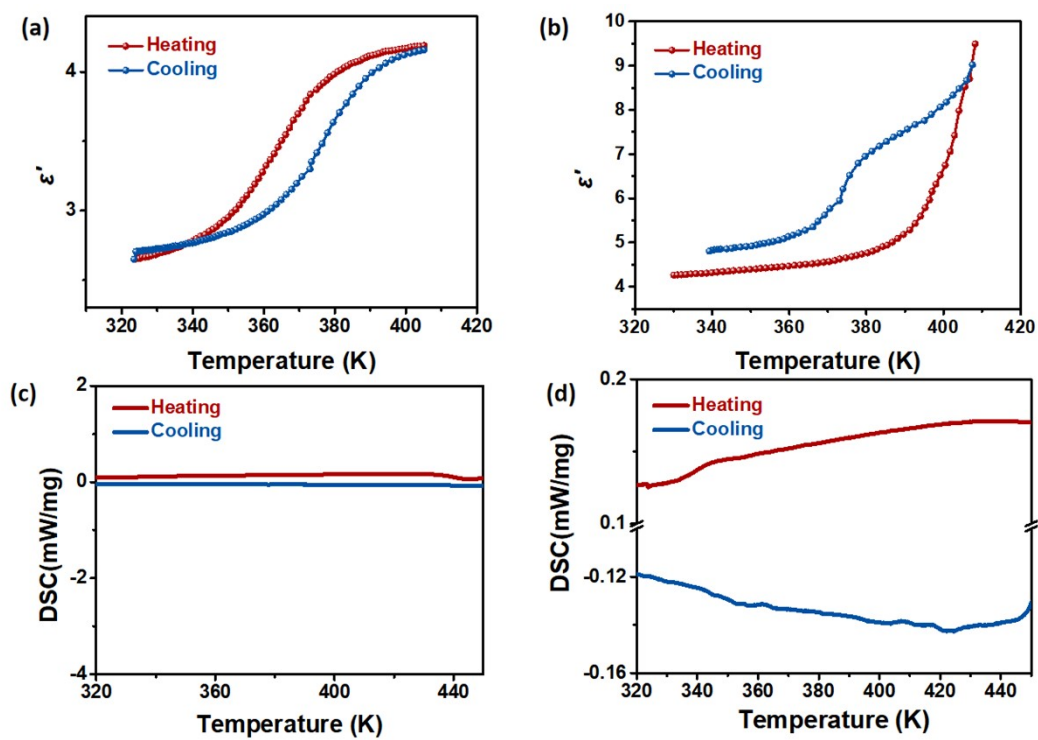

**Figure S6.** Temperature-dependent real part ( $\epsilon'$ ) of the dielectric constant for 2 (a) and 3 (b). DSC curves of 2 (c) and 3 (d).



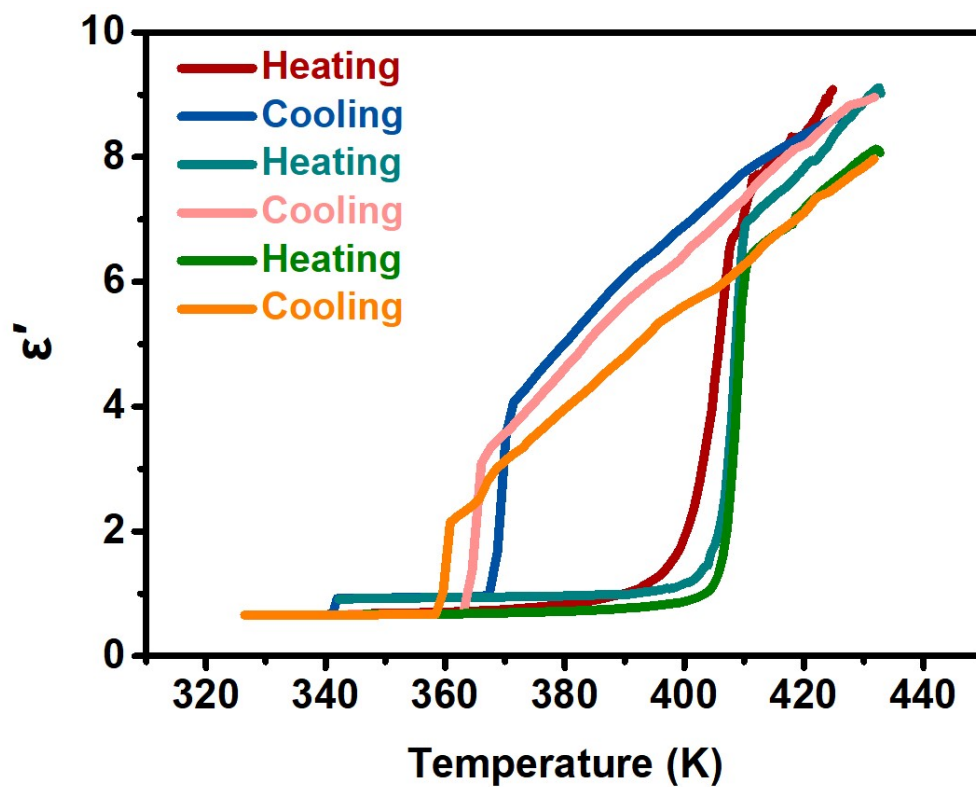

**Figure S7.** Dielectric cycle measurement of compound 1 at 1MHz.

The calculation processes of entropy and N

$$(1) \Delta S = \Delta H \times Mr / K$$

$$= 9.995 \times 429 / 425$$

$$= 10.089 \text{ J (K mol)}^{-1}$$

$$(2) \Delta S = R \ln N \text{ (R=8.314 J/(mol}\cdot\text{K))}$$

$$N = 3.36$$
